# Supplementary material for: Studies on the Lewis acid mediated cleavage of α-aminoacetals: synthesis of novel 1,2-aminoethers, and evidence for α-alkoxy aziridinium ion intermediatesElectronic supplementary information (ESI) available: correlation of 1H NMR spectra between the syn and anti diastereomeric series. See http://www.rsc.org/suppdata/ob/b2/b210116e/
Source: Royal Society of Chemistry journal article supplement (doi:10.1039/b210116e), 2003-02-05
Supplement: b210116e.pdf [file b210116e.pdf]

## Supplementary data

Studies on the Lewis acid mediated cleavage of  $\alpha$ -  
aminoacetals: Synthesis of Novel 1,2-Aminoethers, and  
Evidence for  $\alpha$ -Alkoxy Aziridinium Ion Intermediates.

Mark A. Graham,<sup>a</sup> Alan H. Wadsworth,<sup>b</sup> Abdul Zahid<sup>a</sup> and Christopher M.  
Rayner<sup>a\*</sup>

<sup>a</sup>School of Chemistry, University of Leeds, Leeds, LS2 9JT, UK;

email c.m.rayner@chem.leeds.ac.uk

<sup>b</sup>GlaxoSmithKline Medicines Research Centre, Gunnels Wood Road, Stevenage,  
Herts., SG1 2NY, UK.

**Correlation of <sup>1</sup>H NMR spectra between  
the *syn* and *anti* diastereomeric series.**

## Supplementary data

Although actual chemical shifts differ considerably, the difference in chemical shift between the protons H<sub>a</sub> and H<sub>b</sub> is consistently greater in the *anti* stereoisomer than in the *syn*. In the case of the uracil adduct (**37** R = Bn), only the *syn* product is obtained, however, the value of  $\delta H_a - \delta H_b$  is comparable to that for the pyridone *syn* product (**38** R = Bn). Similarly, a comparison of the difference in chemical shifts of the diastereotopic *N*-benzylic methylene protons for *syn* and *anti* products ( $\delta H_c - \delta H_d$ ) again reveals that in all cases where a comparison is available, the difference in chemical shifts is consistently greater for the products assigned as *syn* compared to those for the *anti*. In the case of the uracil adduct **37** the value of  $\delta H_c - \delta H_d$  is large, which is consistent with the other *syn* examples (Table S4).

Comparative data was only obtained for compounds comprising >10% in mixture.

## Supplementary data

| Product                                                                                                        | R  | $\delta H_a$ | $\delta H_b$ | $\delta H_a - \delta H_b$ | $\delta H_c$ | $\delta H_d$ | $\delta H_c - \delta H_d$ |
|----------------------------------------------------------------------------------------------------------------|----|--------------|--------------|---------------------------|--------------|--------------|---------------------------|
| 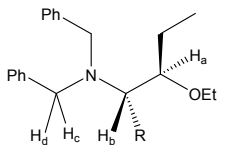<br><b>36 (anti, major)</b>   | Bn | 3.60         | 2.89         | 0.71                      | 3.79         | 3.56         | 0.23                      |
| <br><b>41 (syn, minor)</b>    | Bn | 2.89         | 2.83         | 0.06                      | 4.15         | 3.48         | 0.67                      |
| <br><b>42 (anti, minor)</b>   | Me | 5.73         | 2.87         | 2.86                      | 3.72         | 3.28         | 0.44                      |
| <br><b>37 (syn, major)</b>  | Bn | 5.32         | 2.91         | 2.41                      | 4.14         | 3.56         | 0.58                      |
|                                                                                                                | Me | 5.41         | 2.99         | 2.42                      | 4.01         | 3.41         | 0.60                      |
| <br><b>43 (anti, minor)</b> | Bn | 6.41         | 3.20         | 3.21                      | 3.76         | 3.56         | 0.20                      |
|                                                                                                                | Me | 6.27         | 2.92         | 3.35                      | 3.74         | 3.31         | 0.43                      |
| <br><b>38 (syn, major)</b>  | Bn | 5.92         | 3.28         | 2.64                      | 4.12         | 3.67         | 0.45                      |
|                                                                                                                | Me | 5.99         | 3.03         | 2.96                      | 4.03         | 3.54         | 0.49                      |

**Table S4.** Correlation of  $^1\text{H}$  NMR data of *syn* and *anti* products to confirm stereochemical assignments.
